# Supplementary material
Source: ML conference proceedings conference paper supplement (https://proceedings.mlr.press/v33/wang14d.html)
Supplement: Supplementary file 1 [file wang14d-supp.pdf]

## A Proofs

We begin by introducing some notation. Let  $\mathbf{x}_h^*$  denote the optimal node at level  $h$ . That is the cell of  $\mathbf{x}_h^*$  contains the optimizer  $\mathbf{x}^*$ . Also let  $f^+$  and  $\mathbf{x}^+$  represent the best function value observed thus far and the associated node respectively.

### A.1 Technical Lemmas

**Lemma 1** (Lemma 5 of de Freitas et al. (2012)). *Given a set of points  $\mathbf{x}_{1:T} := \{\mathbf{x}_1, \dots, \mathbf{x}_T\} \in \mathcal{D}$  and a Reproducing Kernel Hilbert Space (RKHS)  $\mathcal{H}$  with kernel  $\kappa$  the following bounds hold:*

1. Any  $f \in \mathcal{H}$  is Lipschitz continuous with constant  $\|f\|_{\mathcal{H}}L$ , where  $\|\cdot\|_{\mathcal{H}}$  is the Hilbert space norm and  $L$  satisfies the following:

$$L^2 \leq \sup_{\mathbf{x} \in \mathcal{D}} \partial_{\mathbf{x}} \partial_{\mathbf{x}'} \kappa(x, x')|_{\mathbf{x}=\mathbf{x}'}$$

and for  $\kappa(\mathbf{x}, \mathbf{x}') = \tilde{\kappa}(\mathbf{x} - \mathbf{x}')$  we have

$$L^2 \leq \partial_{\mathbf{x}}^2 \tilde{\kappa}(\mathbf{x})|_{x=0}.$$

2. The projection operator  $P_{1:T}$  on the subspace  $\text{span}\{\kappa(x_t, \cdot)\}_{t=1:T} \subseteq \mathcal{H}$  is given by

$$P_{1:T}f := \mathbf{k}^\top(\cdot) \mathbf{K}^{-1} \langle \mathbf{k}(\cdot), f \rangle$$

where  $\mathbf{k}(\cdot) = \mathbf{k}_{1:T}(\cdot) := [\kappa(\mathbf{x}_1, \cdot) \cdots \kappa(\mathbf{x}_T, \cdot)]^\top$  and  $\mathbf{K} := [\kappa(\mathbf{x}_i, \mathbf{x}_j)]_{i,j=1:T}$ ; moreover, we have that

$$\langle \mathbf{k}(\cdot), f \rangle := \begin{bmatrix} \langle \kappa(\mathbf{x}_1, \cdot), f \rangle \\ \vdots \\ \langle \kappa(\mathbf{x}_T, \cdot), f \rangle \end{bmatrix} = \begin{bmatrix} f(\mathbf{x}_1) \\ \vdots \\ f(\mathbf{x}_T) \end{bmatrix}.$$

Here  $P_{1:T}P_{1:T} = P_{1:T}$  and  $\|P_{1:T}\| \leq 1$  and  $\|\mathbf{1} - P_{1:T}\| \leq 1$ .

3. Given tuples  $(\mathbf{x}_i, f_i)$  with  $f_i = f(\mathbf{x}_i)$ , the minimum norm interpolation  $\bar{f}$  with  $\bar{f}(\mathbf{x}_i) = f(\mathbf{x}_i)$  is given by  $\bar{f} = P_{1:T}f$ . Consequently its residual  $g := (\mathbf{1} - P_{1:T})f$  satisfies  $g(\mathbf{x}_i) = 0$  for all  $\mathbf{x}_i \in \mathbf{x}_{1:T}$ .

**Lemma 2** (Lemma 6 of de Freitas et al. (2012)). *Under the assumptions of Lemma 1 it follows that*

$$|f(\mathbf{x}) - P_{1:T}f(\mathbf{x})| \leq \|f\|_{\mathcal{H}} \sigma_T(\mathbf{x}),$$

where  $\sigma_T^2(\mathbf{x}) = \kappa(\mathbf{x}, \mathbf{x}) - \mathbf{k}_{1:T}^\top(\mathbf{x}) \mathbf{K}^{-1} \mathbf{k}_{1:T}(\mathbf{x})$  and this bound is tight. Moreover,  $\sigma_T^2(\mathbf{x})$  is the posterior predictive variance of a Gaussian process with the same kernel.

**Lemma 3** (Adapted from Proposition 1 of de Freitas et al. (2012)). *Let  $\kappa : \mathbb{R}^D \times \mathbb{R}^D \rightarrow \mathbb{R}$  be a kernel that is twice differentiable along the diagonal  $\{(\mathbf{x}, \mathbf{x}) \mid \mathbf{x} \in \mathbb{R}^D\}$ , with  $L$  defined as in Lemma 1.1, and  $f$  be an element of the RKHS with kernel  $\kappa$ . If  $f$  is evaluated at point  $\mathbf{x}$ , then for any other point  $\mathbf{y}$  we have  $\sigma_T(\mathbf{y}) \leq L\|\mathbf{x} - \mathbf{y}\|$ .*

*Proof.* Let  $\mathcal{H}$  be the RKHS corresponding to  $\kappa$  and  $f \in \mathcal{H}$  an arbitrary element with  $g := (\mathbf{1} - P_{1:T})f$ ; the residual defined in lemma 1.3. Since  $g \in \mathcal{H}$ , we have by Lemma 1.1,  $g$  is Lipschitz. Thus we have that for any point  $\mathbf{y}$ :

$$|g(\mathbf{y})| \leq L\|g\|_{\mathcal{H}}\|\mathbf{y} - \mathbf{x}\| \leq L\|f\|_{\mathcal{H}}\|\mathbf{y} - \mathbf{x}\|, \quad (2)$$

where the second inequality is guaranteed by Lemma 1.2. On the other hand, by Lemma 2, we know that for all  $\mathbf{y}$  we have the following tight bound:

$$|g(\mathbf{y})| \leq \|f\|_{\mathcal{H}} \sigma_T(\mathbf{y}) \quad (3)$$

Now, given the fact that both inequalities (2) and (3) are bounding the same quantity and that the latter is a tight estimate, we necessarily have that:

$$\|f\|_{\mathcal{H}} \sigma_T(\mathbf{y}) \leq L\|f\|_{\mathcal{H}}\|\mathbf{y} - \mathbf{x}\|.$$

Canceling  $\|f\|_{\mathcal{H}}$  gives us the result.  $\square$

**Lemma 4** (Adapted from Lemma 5.1 of Srinivas et al. (2010)). *Let  $f$  be a sample from a GP. Consider  $\eta \in (0, 1)$  and set  $B_T = 2 \log(\pi_T/\eta)$  where  $\sum_{i=1}^{\infty} \pi_T^{-1} = 1$ ,  $\pi_T > 0$ . Then,*

$$|f(\mathbf{x}_T) - \mu_T(\mathbf{x}_T)| \leq B_T^{1/2} \sigma_T(\mathbf{x}_T) \quad \forall T \geq 1$$

holds with probability at least  $1 - \eta$ .

*Proof.* For  $\mathbf{x}_T$  we have that  $f(\mathbf{x}) \sim \mathcal{N}(\mu_T(\mathbf{x}_T), \sigma_T(\mathbf{x}_T))$  since  $f$  is a sample from the GP. Now, if  $r \sim \mathcal{N}(0, 1)$ , then

$$\begin{aligned} \mathbb{P}(r > c) &= e^{-c^2/2} (2\pi)^{-1/2} \int e^{-(r-c)^2/2 - c(r-c)} dr \\ &< e^{-c^2/2} \mathbb{P}(r > 0) = \frac{1}{2} e^{-c^2/2}. \end{aligned}$$

Thus we have that

$$\mathbb{P}\left(f(\mathbf{x}) - \mu_T(\mathbf{x}) > B_T^{1/2} \sigma_T(\mathbf{x})\right) = \mathbb{P}(r > B_T^{1/2}) < \frac{1}{2} e^{-B_T/2}.$$

By symmetry and the union bound, we have that  $\mathbb{P}\left(|f(\mathbf{x}) - \mu_T(\mathbf{x})| > B_T^{1/2} \sigma_T(\mathbf{x})\right) < e^{-B_T/2}$ . By applying the union bound again, we derive

$$\mathbb{P}\left(|f(\mathbf{x}) - \mu_T(\mathbf{x})| > B_T^{1/2} \sigma_T(\mathbf{x}) \quad \forall T \geq 1\right) < \sum_{T=1}^{\infty} e^{-B_T/2}.$$

By substituting  $B_T = 2 \log(\pi_T/\eta)$ , we obtain the result. As in Srinivas et al. (2010), we can set  $\pi_T = \pi^2 T^2 / 6$ .  $\square$

Since each node's UCB and LCB are only evaluated at most once, we give the following shorthands in notation. Let  $N(\mathbf{x})$  be the number of evaluations of confidence bounds by the time the UCB of  $\mathbf{x}$  is evaluated (line 12 of Algorithm 3) and let  $T(\mathbf{x}) = |\mathcal{D}_t|$  be the time the UCB of  $\mathbf{x}$  is evaluated. Define  $\mathcal{U}(\mathbf{x}) = \mathcal{U}_{N(\mathbf{x})}(\mathbf{x}|\mathcal{D}_{T(\mathbf{x})}) = \mu(\mathbf{x}|\mathcal{D}_{T(\mathbf{x})}) + B_{N(\mathbf{x})}\sigma(\mathbf{x}|\mathcal{D}_{T(\mathbf{x})})$  and  $\mathcal{L}(\mathbf{x}) = \mathcal{L}_{N(\mathbf{x})}(\mathbf{x}|\mathcal{D}_{T(\mathbf{x})}) = \mu(\mathbf{x}|\mathcal{D}_{T(\mathbf{x})}) - B_{N(\mathbf{x})}\sigma(\mathbf{x}|\mathcal{D}_{T(\mathbf{x})})$ .

**Lemma 5.** *Consider  $\mathcal{B}(\mathbf{x}^*, \rho)$  and  $\gamma \in (0, 1)$  as in Assumptions 2 and 3. Suppose  $\mathcal{L}(\mathbf{x}_h^*) \leq f(\mathbf{x}_h^*) \leq \mathcal{U}(\mathbf{x}_h^*)$ . If  $\mathbf{x}_h^* \in \mathcal{B}(\mathbf{x}^*, \rho)$  and  $\delta(h) < \epsilon_0$  then there exists a constant  $\bar{c}$  such that  $\mathcal{L}(\mathbf{x}_h^*) \geq f^* - \bar{c} B_{N(\mathbf{x}_h^*)} \gamma^{h/2}$ .*

*Proof.* If  $\mathbf{x}_h^*$  is not evaluated then  $f(\mathbf{x}^+) \geq \mathcal{U}_T(\mathbf{x}_h^*) \geq f^* - \delta(h) \geq f^* - \epsilon_0$  which implies that  $\mathbf{x}^+ \in \mathcal{B}(\mathbf{x}^*, \rho)$ . Therefore,  $f^* - c_2 \|\mathbf{x}^+ - \mathbf{x}^*\|^2 \geq f(\mathbf{x}^+) \geq \mathcal{U}_T(\mathbf{x}_h^*) \geq f^* - \delta(h)$  which in turn implies that  $\|\mathbf{x}^+ - \mathbf{x}^*\| \leq \sqrt{\frac{\delta(h)}{c_2}}$ . Similarly  $f^* - c_2 \|\mathbf{x}_h^* - \mathbf{x}^*\|^2 \geq f(\mathbf{x}_h^*) \geq f^* - \delta(h)$ . Therefore  $\|\mathbf{x}_h^* - \mathbf{x}^*\| \leq \sqrt{\frac{\delta(h)}{c_2}}$ . By the triangle inequality, we have

$$\|\mathbf{x}^+ - \mathbf{x}_h^*\| \leq \|\mathbf{x}^+ - \mathbf{x}^*\| + \|\mathbf{x}_h^* - \mathbf{x}^*\| \leq 2\sqrt{\frac{\delta(h)}{c_2}}.$$

By Lemma 3, we have that  $\sigma_{T(\mathbf{x}_h^*)}(\mathbf{x}_h^*) \leq 2L\sqrt{\frac{\delta(h)}{c_2}}$ . By the definition of  $\mathcal{L}_T$ , we can argue that

$$\begin{aligned} \mathcal{L}(\mathbf{x}_h^*) &\geq \mathcal{U}(\mathbf{x}_h^*) - 4B_{N(\mathbf{x}_h^*)} L \sqrt{\frac{\delta(h)}{c_2}} \\ &\geq f^* - \delta(h) - 4B_{N(\mathbf{x}_h^*)} L \sqrt{\frac{\delta(h)}{c_2}} \\ &= f^* - c\gamma^h - 4B_{N(\mathbf{x}_h^*)} L \sqrt{\frac{c\gamma^h}{c_2}}. \end{aligned}$$

Note that since  $\gamma \in (0, 1)$ ,  $\gamma < \gamma^{1/2}$ . Assume that  $B_1 = b$ . Let  $\bar{c} = c/b + 4L\sqrt{\frac{c}{c_2}}$ . Since  $B_N > B_1 \quad \forall N > 1$ , we have the statement.

If  $\mathbf{x}_h^*$  is evaluated then the statement is trivially true.  $\square$

**Definition 1.** Let  $\bar{\gamma} := \gamma^{\frac{1}{2}}$ ,  $\bar{\delta}_h := \bar{c}B_{N(\mathbf{x}_h^*)}\bar{\gamma}^h$ , and  $I_h^\epsilon = \{(h, i) : f(\mathbf{x}_{h,i}) + \epsilon \geq f^*\}$ .

**Lemma 6.** Assume that  $h_{\max} = n^\epsilon$ . For a node  $\mathbf{x}_{h,i}$  at level  $h$ ,  $B_{N(\mathbf{x}_{h,i})} = \mathcal{O}(\sqrt{h})$ .

*Proof.* Assume that there are  $n_i$  nodes expanded at the end of iteration  $i$  of the outer loop (the while loop). In the  $i + 1$ <sup>th</sup> iteration of the outer loop, there can be at most  $h_{\max}(n_i)$  additional expansions added. Thus the total number of expansions at the end of iteration  $i$  is at most  $n_{i-1} + h_{\max}(n_{i-1})$ . We can prove by induction that  $n_i \leq i^{\frac{1}{1-\epsilon}}$ . Since any node at level  $h$  would be expanded after at most  $2^h$  iterations, at the time of expansion of any node at level  $h$ , we have that  $n < (2^h)^{\frac{1}{1-\epsilon}} = 2^{\frac{h}{1-\epsilon}}$  where  $n$  is the total number of expansions. Thus, there would be at most  $2 \times 2^{\frac{h}{1-\epsilon}}$  evaluations. Hence,

$$B_{N(\mathbf{x}_{h,i})} \leq \sqrt{2 \log(\pi^2 2^{\frac{2h}{1-\epsilon} + 2} / 6\eta)} \leq \sqrt{2 \log(2^{\frac{2h}{1-\epsilon} + 2}) + 2 \log(\pi^2 / 6\eta)} = \mathcal{O}(\sqrt{h}).$$

□

**Lemma 7.** After a finite number of node expansions, an optimal node  $\mathbf{x}_{h_0}^* \in \mathcal{B}(\mathbf{x}^*, \rho)$  is expanded such that  $\bar{c}B_{N(\mathbf{x}_{h_0}^*)}\bar{\gamma}_0^h \leq \epsilon_0$ . Also  $\forall h > h_0$ , we have that  $\bar{c}B_{N(\mathbf{x}_h^*)}\bar{\gamma}^h \leq \epsilon_0$  and  $\mathbf{x}_h^* \in \mathcal{B}(\mathbf{x}^*, \rho)$ .

*Proof.* Since it is clear that BaMSOO would expand every node after a finite number of node expansions, we only have to show that there exists an  $h_0$  that satisfies the conditions. By Lemma 6, we have that  $\forall h B_{N(\mathbf{x}_h^*)} = \mathcal{O}(\sqrt{h})$ . Since  $\bar{\gamma} < 1$ , there exists an  $h_0$  such that  $\bar{c}B_{N(\mathbf{x}_h^*)}\bar{\gamma}^h \leq \epsilon_0 \forall h > h_0$ . Since  $f(\mathbf{x}_h^*) > f^* - \delta(h) > f^* - \bar{c}B_{N(\mathbf{x}_h^*)}\bar{\gamma}^h \geq f^* - \epsilon_0$ , we have by Assumption 2 that,  $\mathbf{x}_h^* \in \mathcal{B}(\mathbf{x}^*, \rho)$ . □

**Lemma 8.**  $\sum_{h=0}^H |I_h^{\bar{\delta}(H)}| \leq C \left(B_{N(\mathbf{x}_H^*)}\right)^{D/2} \gamma^{(D/4-D/\alpha)H}$  for some constant  $C$  for all  $H > h_0$ .

*Proof.* By Lemma 7, we know that  $\bar{\delta}(H) = \bar{c}B_{N(\mathbf{x}_H^*)}\bar{\gamma}^H < \epsilon_0$  if  $H > h_0$ . Therefore, by Assumption 2, we have that  $\chi_{\bar{\delta}(H)} = \{\mathbf{x} \in \mathcal{X} : f(\mathbf{x}) \geq f^* - \bar{\delta}(H)\} \subseteq \mathcal{B}(\mathbf{x}^*, \rho)$ . Again by Assumption 2, we have that

$$f^* - \bar{\delta}(H) \leq f(\mathbf{x}) \leq f^* - c_2 \|\mathbf{x} - \mathbf{x}^*\|_2^2 \forall \mathbf{x} \in \chi_{\bar{\delta}(H)}.$$

$$\text{Thus } \chi_{\bar{\delta}(H)} \subseteq \mathcal{B}\left(\mathbf{x}^*, \sqrt{\frac{\bar{\delta}(H)}{c_2}}\right) = \mathcal{B}\left(\mathbf{x}^*, \sqrt{\frac{\bar{c}B_{N(\mathbf{x}_H^*)}\bar{\gamma}^{H/2}}{c_2}}\right).$$

Since each cell  $(h, i)$  contains a  $\ell$ -ball of radius  $\nu\delta(h)$  centered at  $\mathbf{x}_{h,i}$  we have that each cell contains a ball  $\mathcal{B}(\mathbf{x}_{h,i}, (\nu\delta(h))^{1/\alpha}) = \mathcal{B}(\mathbf{x}_{h,i}, (\frac{\nu\bar{c}}{c_1})^{1/\alpha}\bar{\gamma}^{h/\alpha})$ . By the argument of volume, we have that  $|I_h^{\bar{\delta}(H)}| \leq C_1 \left(B_{N(\mathbf{x}_H^*)}\right)^{D/2} \gamma^{HD/4-hD/\alpha}$  for some constant  $C_1$ . Finally,

$$\begin{aligned} \sum_{h=0}^H |I_h^{\bar{\delta}(H)}| &\leq C_1 \sum_{h=0}^H \left(B_{N(\mathbf{x}_H^*)}\right)^{D/2} \gamma^{HD/4-hD/\alpha} \\ &= C_1 \left(B_{N(\mathbf{x}_H^*)}\right)^{D/2} \gamma^{HD/4} \sum_{h=0}^H \gamma^{-hD/\alpha} \\ &= C_1 \left(B_{N(\mathbf{x}_H^*)}\right)^{D/2} \gamma^{HD/4} \sum_{h=0}^H \left(\gamma^{D/\alpha}\right)^{h-H} \\ &\leq C_1 \left(B_{N(\mathbf{x}_H^*)}\right)^{D/2} \gamma^{HD/4} \sum_{h=0}^{\infty} \left(\gamma^{D/\alpha}\right)^{h-H} \\ &= C_1 \left(B_{N(\mathbf{x}_H^*)}\right)^{D/2} \gamma^{HD/4} \frac{\gamma^{-DH/\alpha}}{1 - \gamma^{D/\alpha}} \\ &= \frac{C_1}{1 - \gamma^{D/\alpha}} \left(B_{N(\mathbf{x}_H^*)}\right)^{D/2} \gamma^{HD/4-DH/\alpha} \\ &= \frac{C_1}{1 - \gamma^{D/\alpha}} \left(B_{N(\mathbf{x}_H^*)}\right)^{D/2} \gamma^{(D/4-D/\alpha)H}. \end{aligned}$$

Setting  $C = \frac{C_1}{1-\gamma^{b/\alpha}}$  gives us the desired result.  $\square$

**Lemma 9.** Suppose  $\mathcal{L}(\mathbf{x}_h^*) \leq f(\mathbf{x}_h^*) \leq \mathcal{U}(\mathbf{x}_h^*)$ . If  $\mathbf{x}_h^*$  is not evaluated (that is  $\mathcal{U}(\mathbf{x}_h^*) < f^+$ ) then  $f^+$  is  $\delta(h)$ -optimal.

*Proof.*  $f^+ > \mathcal{U}(\mathbf{x}_h^*) \geq f(\mathbf{x}_h^*) > f^* - \delta(h)$ .  $\square$

## A.2 Main Results

### A.2.1 Simple Regret

Let  $h_n^*$  be the deepest level of an expanded optimal node with  $n$  node expansions. This following lemma is adapted from Lemma 2 of Munos (2011).

**Lemma 10.** Suppose  $\mathcal{L}(\mathbf{x}) \leq f(\mathbf{x}) \leq \mathcal{U}(\mathbf{x})$  for all  $\mathbf{x}$  whose confidence region are evaluated. Whenever  $h \leq h_{\max}(n)$  and  $n \geq Ch_{\max}(n) \sum_{i=h_0}^h \left(B_{N(\mathbf{x}_i^*)}\right)^{D/2} \gamma^{(D/4-D/\alpha)i} + n_0$  for some constant  $C$ , we have  $h_n^* \geq h$ .

*Proof.* We prove the statement by induction. By Lemma 7, we have that after  $n_0$  node expansions, a node  $\mathbf{x}_{h_0}^* \in \mathcal{B}(\mathbf{x}^*, \rho)$  is expanded. Also  $\forall h > h_0$ , we have that  $\bar{c}B_{N(\mathbf{x}_h^*)} \bar{\gamma}^h \leq \epsilon_0$  and  $\mathbf{x}_h^* \in \mathcal{B}(\mathbf{x}^*, \rho)$ . For  $h = h_0$ , the statement is trivially satisfied. Thus assume that the statement is true for  $h$ . Let  $n$  be such that  $n \geq Ch_{\max}(n) \sum_{i=h_0}^{h+1} \left(B_{N(\mathbf{x}_i^*)}\right)^{D/2} \gamma^{(D/4-D/\alpha)i} + n_0$ . By the inductive hypothesis we have that  $h_n^* \geq h$ . Assume  $h_n^* = h$  since otherwise the proof is finished. As long as the optimal node at level  $h+1$  is not expanded, all nodes expanded at the level are  $\bar{\delta}(h+1)$ -optimal by Lemma 5. By Lemma 8, we know that after  $Ch_{\max}(n) \left(B_{N(\mathbf{x}_{h+1}^*)}\right)^{D/2} \gamma^{(D/4-D/\alpha)(h+1)}$  node expansions, the optimal node at level  $h+1$  will be expanded since there are at most  $\sum_{i=0}^{h+1} \left|I_i^{\bar{\delta}(h+1)}\right| \bar{\delta}(h+1)$ -optimal nodes at or beneath level  $h+1$ . Thus  $h_n^* \geq h+1$ .  $\square$

**Theorem 1.** Suppose  $\mathcal{L}(\mathbf{x}) \leq f(\mathbf{x}) \leq \mathcal{U}(\mathbf{x})$  for all  $\mathbf{x}$  whose confidence region is evaluated. Let us write  $h(n)$  to be the smallest integer  $h \geq h_0$  such that

$$Ch_{\max}(n) \sum_{i=h_0}^h \left(B_{N(\mathbf{x}_i^*)}\right)^{D/2} \gamma^{(D/4-D/\alpha)i} + n_0 \geq n.$$

Then the loss is bounded as

$$r_n \leq \delta(\min\{h(n), h_{\max}(n) + 1\})$$

and  $h_n^* \geq \min\{h(n) - 1, h_{\max}(n)\}$ .

*Proof.* From Lemma 8, and the definition of  $h(n)$  we have that

$$Ch_{\max}(n) \sum_{i=h_0}^{h(n)-1} \left(B_{N(\mathbf{x}_i^*)}\right)^{D/2} \gamma^{(D/4-D/\alpha)i} + n_0 < n.$$

By Lemma 10, we have that  $h_n^* \geq h(n) - 1$  if  $h(n) - 1 \leq h_{\max}(n)$  and  $h_n^* \geq h_{\max}(n)$  otherwise. Therefore  $h_n^* \geq \min\{h(n) - 1, h_{\max}(n)\}$ .

By Lemma 9, we know that if  $\mathbf{x}_{h_n^*+1}^*$  is not evaluated then  $f^+$  is  $\delta(h_n^*+1)$ -optimal. If  $\mathbf{x}_{h_n^*+1}^*$  is evaluated, then  $f(\mathbf{x}_{h_n^*+1}^*)$  is  $\delta(h_n^*+1)$ -optimal. Thus  $r_n \leq \delta(\min\{h(n), h_{\max}(n) + 1\})$ .  $\square$

*Proof of Corollary 1.* Suppose  $\mathcal{L}(\mathbf{x}) \leq f(\mathbf{x}) \leq \mathcal{U}(\mathbf{x})$  for all  $\mathbf{x}$  whose confidence region is evaluated. By Lemma 4, we know that this holds with probability at least  $1 - \eta$ .

By the definition of  $h(n)$  we have that

$$\begin{aligned}
 n &\leq Ch_{\max}(n) \sum_{i=h_0}^{h(n)} \left( B_N(\mathbf{x}_i^*) \right)^{D/2} \gamma^{(D/4-D/\alpha)i} + n_0 \\
 &\leq Ch_{\max}(n) \left( B_N(\mathbf{x}_{h(n)}^*) \right)^{D/2} \sum_{i=h_0}^{h(n)} \gamma^{-di} + n_0 \\
 &\leq Ch_{\max}(n) \left( B_N(\mathbf{x}_{h(n)}^*) \right)^{D/2} \gamma^{-dh_0} \frac{\gamma^{-dh(n)} - 1}{\gamma^{-d} - 1} + n_0
 \end{aligned} \tag{4}$$

If  $h(n) \leq h_{\max}(n) + 1$ , then by Theorem 1, we have that  $h_n^* \geq h(n) - 1$ . After  $n$  expansions, the optimal node  $\mathbf{x}_{h(n)-1}^*$  has been expanded which suggests that its children's confidence bounds have been evaluated. Hence,  $N(\mathbf{x}_{h(n)}^*) < 2n$  since there have only been  $n$  expansions. Therefore,

$$(4) \leq Kn^\epsilon (B_{2n})^{D/2} \gamma^{-dh(n)}$$

for some constant  $K$  which implies that

$$\gamma^{h(n)} \leq K^{1/d} B_{2n}^{\frac{2\alpha}{4-\alpha}} n^{-\frac{1-\epsilon}{d}} = K^{1/d} [2 \log(4\pi^2 n^2 / 6\eta)]^{\frac{\alpha}{4-\alpha}} n^{-\frac{1-\epsilon}{d}}.$$

By Theorem 1, we have that

$$r_n \leq c \min \left\{ K^{1/d} [2 \log(4\pi^2 n^2 / 6\eta)]^{\frac{\alpha}{4-\alpha}} n^{-\frac{1-\epsilon}{d}}, \gamma^{(n+1)^\epsilon} \right\} = \mathcal{O} \left( n^{-\frac{1-\epsilon}{d}} \log^{\frac{\alpha}{4-\alpha}}(n^2 / \eta) \right).$$

□
